# Supplementary material for: Approaching theoretical specific capacity of iron-rich lithium iron silicate using graphene-incorporation and fluorine-doping
Source: Royal Society of Chemistry journal article supplement (doi:10.1039/d1ta09417c), 2022-01-01
Supplement: d1ta09417c1.pdf [file d1ta09417c1.pdf]

## Approaching Theoretical Specific Capacity of Iron-Rich Lithium Iron Silicate Using Graphene-incorporation and Fluoride-doping

Tianwei Liu,<sup>a,b,†</sup> Yadong Liu,<sup>b,†</sup> Yikang Yu,<sup>b,c</sup> Yang Ren,<sup>d</sup> Chengjun Sun,<sup>e</sup> Yuzi Liu,<sup>f</sup> Jiayi Xu,<sup>g</sup> Cong Liu,<sup>g</sup> Zhenzhen Yang,<sup>g</sup> Wenquan Lu,<sup>g</sup> Paulo Ferreira,<sup>h</sup> Zisheng Chao,<sup>a</sup> and Jian Xie<sup>\*b</sup>

<sup>a</sup> State Key Laboratory for Chemo/Biosensing and Chemometrics, College of Chemistry and Chemical Engineering, Hunan University, Changsha 410082, China

<sup>b</sup> Department of Mechanical & Energy Engineering, Purdue School of Engineering and Technology, Indiana University-Purdue University, Indianapolis, Indiana 46202, USA.

Email: [jianxie@iupui.edu](mailto:jianxie@iupui.edu)

<sup>c</sup> School of Mechanical Engineering, Purdue University, West Lafayette, IN, 47907, USA

<sup>d</sup> Department of Physics, City University of Hong Kong, Kowloon, Hong Kong, China

<sup>e</sup> X-ray Science Division, Advanced Photon Source, Argonne National Laboratory, 9700 South Cass Avenue, Lemont, Illinois 60439, USA.

<sup>f</sup> Center for Nanoscale Materials, Argonne National Laboratory, 9700 South Cass Avenue, Lemont, Illinois 60439, USA

<sup>g</sup> Chemical Science and Engineering Division, Argonne National Laboratory, 9700 South Cass Avenue, Lemont, Illinois 60439, USA.

<sup>h</sup> Department of Mechanical Engineering, University of Texas at Austin, TX, 78712, USA

† These authors contributed equally to this work.

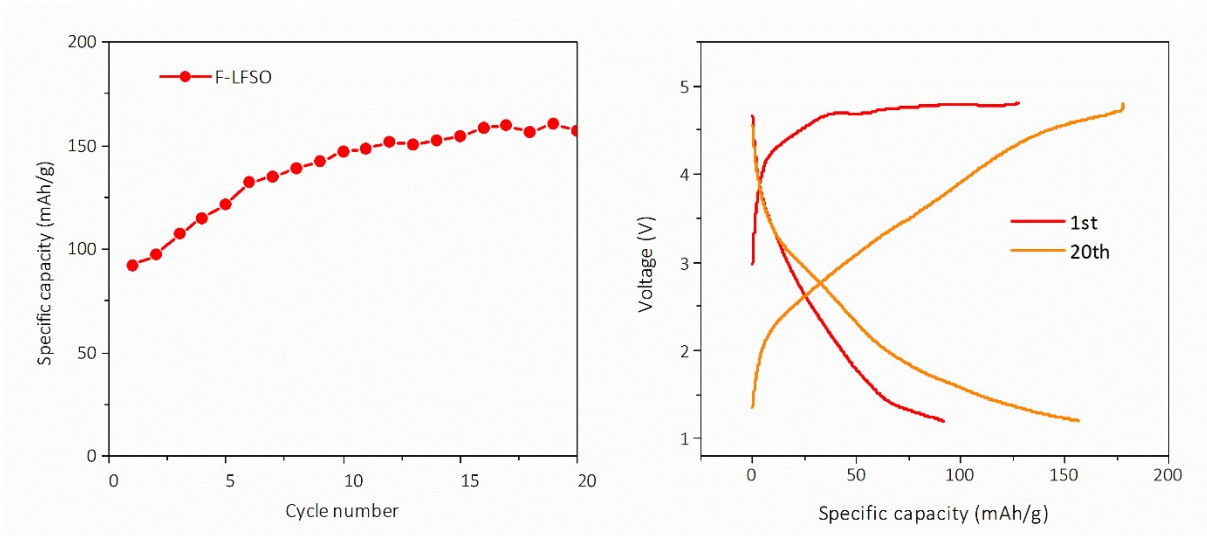

Figure S1. Electrochemical cycling of pure F-LFSO materials at 0.1C.
